# Supplementary material for: Capping-RACE: a simple, accurate, and sensitive 5′ RACE method for use in prokaryotes
Source: PubMed Central journal article supplement — Nucleic Acids Res. 2018 Aug 10;46(21):e129. doi: 10.1093/nar/gky739 (PMC6265449; doi:10.1093/nar/gky739), 2018-08-10
Supplement: gky739_supplemental_tables.pdf [file gky739_supplemental_tables.pdf]

Table S1. List of primers used in this study

| Primer names         | Primer sequences (5'-3')                                      | Purposes                                                             |
|----------------------|---------------------------------------------------------------|----------------------------------------------------------------------|
| Cas9-F               | CAGTAATACGACTCACTATTAGAAGCGACT<br>CGTCTCAAACGG                | Amplification template of the 111 nt <i>in vitro</i> transcribed RNA |
| Cas9-R               | AGGATGACGTTTCATGCTTCTTGT                                      |                                                                      |
| FAM-RT primer1       | FAM-CTATCATCTACTTTTCGCCATCTCA                                 | RT primer of <i>in vitro</i> transcribed RNA                         |
| A8 <sub>AG</sub> -F  | CAGTAATACGACTCACTATTAGAACAACGG<br>CGCCGCGGTAACGCGGCCACGCGG    | Amplification template for A8 <sub>AG</sub>                          |
| G8 <sub>GG</sub> -F  | TAATACGACTCACTATAGGAACAACGGCGC<br>CGCGGTAACGCGGCCACGCGG       | Amplification template for G8 <sub>GG</sub>                          |
| G8 <sub>GA</sub> -F  | TAATACGACTCACTATAGAAACAACGGCGC<br>CGCGGTAACGCGGCCACGCGG       | Amplification template for G8 <sub>GA</sub>                          |
| G8 <sub>GU</sub> -F  | TAATACGACTCACTATAGTAACAACGGCGC<br>CGCGGTAACGCGGCCACGCGG       | Amplification template for G8 <sub>GU</sub>                          |
| G8 <sub>GC</sub> -F  | TAATACGACTCACTATAGCAACAACGGCGC<br>CGCGGTAACGCGGCCACGCGG       | Amplification template for G8 <sub>GC</sub>                          |
| G0-F                 | TAATACGACTCACTATAGGCGCCGCGGTAA<br>CGCGGCCACGCGG               | Amplification template for G0                                        |
| G1-F                 | TAATACGACTCACTATAGGGCGCCGCGGT<br>AACGCGGCCACGCGG              | Amplification template for G1                                        |
| G2-F                 | TAATACGACTCACTATAGGGGCGCCGCGG<br>TAACGCGGCCACGCGG             | Amplification template for G2                                        |
| G3-F                 | TAATACGACTCACTATAGGAGGCGCCGCG<br>GTAACGCGGCCACGCGG            | Amplification template for G3                                        |
| G4-F                 | TAATACGACTCACTATAGGAAGGCGCCG<br>GGTAACGCGGCCACGCGG            | Amplification template for G4                                        |
| IVT-R                | CAAGCAGAAGACGGCATAACGAGATTCGCG<br>TTTCCGCGTGCGCCGCGTTACCGCGGC | Amplification template for A8 <sub>AG</sub> to G4                    |
| FAM-RT primer 2      | FAM-CAAGCAGAAGACGGCATAACGAGAT                                 | RT primer of <i>in vitro</i> transcribed RNA                         |
| TSO                  | ACACTCTTTCCCTACACGACGCTCTTCCGA<br>TCTrGrGrG                   | Template switching oligonucleotide containing 3' poly(rG) tail       |
| RLM adaptor          | ACACUCUUUCCCUACACGACGCUCUUCGG<br>AUCU                         | RNA adaptor for RLM-RACE                                             |
| outer primer         | AATGATACGGCGACCACCGAGATCTACACT<br>CTTCCCTACACGACGCTCTTCCGATCT | Nest-PCR first round primer                                          |
| inner primer         | CTACACGACGCTCTTCCGATCT                                        | Nest-PCR second round primer                                         |
| <i>E. ompA</i> -GSP1 | GTAGATGTCCAGGTCGTCAAGT                                        | <i>E. coli</i> MG1655 <i>ompA</i> 5' RACE                            |
| <i>E. ompA</i> -GSP2 | GCCAACATACGGGTTAACCTGG                                        |                                                                      |
| <i>E. sodB</i> -GSP1 | CGCTGCATCAGTAAACTGCGC                                         | <i>E. coli</i> MG1655 <i>sodB</i> 5' RACE                            |
| <i>E. sodB</i> -GSP2 | CAGACCTGAGCTGCGTTGTTG                                         |                                                                      |
| <i>E. shiA</i> -GSP1 | CCAATCAAGGCTGTCGCGATG                                         | <i>E. coli</i> MG1655 <i>shiA</i> 5' RACE                            |
| <i>E. shiA</i> -GSP2 | CCGACGCCAAAGGTAGCAAATG                                        |                                                                      |

|                        |                         |                                                 |
|------------------------|-------------------------|-------------------------------------------------|
| <i>E.ryhB</i> -GSP1    | AGCACCCGGCTGGCTAAG      | <i>E.coli</i> MG1655 <i>ryhB</i> 5' RACE        |
| <i>E.ryhB</i> -GSP2    | CTGGAAGCAATGTGAGCAATG   |                                                 |
| <i>E.micC</i> -GSP1    | GACGACTGTTCGGGCTTG      | <i>E.coli</i> MG1655 <i>micC</i> 5' RACE        |
| <i>E.micC</i> -GSP2    | GTTGGAAAATCAGTGGCAATGC  |                                                 |
| <i>B.ompA</i> -GSP1    | GACCTGATCCTGATCCGTATCG  | <i>B. melitensis</i> 16M <i>ompA</i> 5' RACE    |
| <i>B.ompA</i> -GSP2    | GCGGTCCATGTAGTTACCGATG  |                                                 |
| <i>B.rne</i> -GSP1     | GCCTTGGCTTCCGCTTCAAGC   | <i>B. melitensis</i> 16M <i>rne</i> 5' RACE     |
| <i>B.rne</i> -GSP2     | GCCAGGAAGCCATGGCGATTG   |                                                 |
| <i>B.rppH</i> -GSP1    | GGCGAACCATTTCTGCGTCTG   | <i>B. melitensis</i> 16M <i>rppH</i> 5' RACE    |
| <i>B.rppH</i> -GSP2    | CAGAAGCGAGACCGACGTCATG  |                                                 |
| <i>B.bsnc135</i> -GSP1 | AAAGAGCCGCAAGGGCGGCTC   | <i>B. melitensis</i> 16M <i>bsnc135</i> 5' RACE |
| <i>B.bsnc135</i> -GSP2 | GAGTTTAAACAGGGAGGCGTCAA |                                                 |
| <i>B.bsnc149</i> -GSP1 | AAGCCCCTGCGCAATAGCGCAG  | <i>B. melitensis</i> 16M <i>bsnc149</i> 5' RACE |
| <i>B.bsnc149</i> -GSP2 | CAGGTGGTTCTCGTTAATGAATG |                                                 |
